# Supplementary material for: Prognostic impact of lymph node parameters in distal cholangiocarcinoma after pancreaticoduodenectomy
Source: Springer Nature journal article supplement (doi:10.1186/s12957-020-02040-1), 2020-10-08
Supplement: MOESM1 [file 18463622]

首都医科大学附属北京朝阳医院动物福利与伦理工作委员会  
 科研课题申报快速审查批件 (1.0 版)

受理号: 2020-3-17-139

编号: 2020-科-139

|                                                                                                                                                  |                                                                                                       |           |                |
|--------------------------------------------------------------------------------------------------------------------------------------------------|-------------------------------------------------------------------------------------------------------|-----------|----------------|
| 科研项目名称                                                                                                                                           | Prognostic impact of lymph node parameters in distal cholangiocarcinoma after pancreaticoduodenectomy |           |                |
| 申报课题类型                                                                                                                                           | 其它                                                                                                    |           |                |
| 我院项目负责人                                                                                                                                          | 吕少诚                                                                                                   |           |                |
| 项目负责人所在科室                                                                                                                                        | 肝胆外科                                                                                                  |           |                |
| 报送材料                                                                                                                                             | 科研项目伦理审查申请表                                                                                           |           |                |
|                                                                                                                                                  | 项目申请书                                                                                                 |           |                |
|                                                                                                                                                  | 知情同意书                                                                                                 |           |                |
| 主审委员                                                                                                                                             | 顾佳                                                                                                    |           |                |
| 主审结果                                                                                                                                             | 同意 (1) 票                                                                                              | 不同意 (0) 票 | 作必要修改后同意 (0) 票 |
| 审查决定                                                                                                                                             | <input checked="" type="checkbox"/> 同意 <input type="checkbox"/> 作必要修改后同意 <input type="checkbox"/> 不同意 |           |                |
| 审查意见:                                                                                                                                            | 无                                                                                                     |           |                |
| 注意事项:                                                                                                                                            | 1. 本申报审查批件将在伦理办公室备案。<br>2. 请在项目获得有关部门批准并在我院正式立项后重新递交伦理审查资料, 经我院伦理委员会会议审查批准后方可开展研究。                    |           |                |
| 主任委员/副主任委员<br>动物福利与伦理工作委员会 (盖章)<br><br>医学伦理委员会<br>2020年4月7日 |                                                                                                       |           |                |
